# Supplementary material
Source: MDPI journal article supplement (https://www.mdpi.com/2073-4395/11/1/170)
Supplement: s1 [file s1]

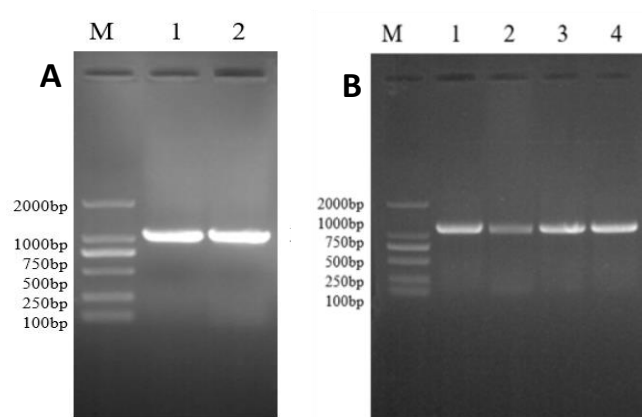

**Figure S1.** Construction of soybean plant expression vector pCAMBIA3301-GmTGA15 (**A**) transformed into *Agrobacterium rhizogenes* (**B**). Lane M indicates the DL2000 markers. Lanes 1 and 2 in (**A**) indicate the PCR products (1089 bp) of *GmTGA15* amplified from two vectors randomly chosen. Lanes 1–4 in (**B**) present the PCR products (1089 bp) of *GmTGA15* amplified from four lines of randomly chosen vectors transformed into *Agrobacterium rhizogenes*.
